# Supplementary material for: Artificial intelligence in food and nutrition evidence: The challenges and opportunities
Source: PubMed Central journal article supplement — PNAS Nexus. 2024 Oct 15;3(12):pgae461. doi: 10.1093/pnasnexus/pgae461 (PMC11638775; doi:10.1093/pnasnexus/pgae461), 2024-10-15
Supplement: pgae461_supplementary_data.pdf [file pgae461_supplementary_data.pdf]

# Supplementary Information for Artificial Intelligence in Food and Nutrition Evidence: The Challenges and Opportunities

<sup>1,2</sup>Regan L. Bailey, <sup>1,3</sup>Amanda J. MacFarlane, <sup>4</sup>Martha S. Field, <sup>5,6</sup>Ilias Tagkopoulos, <sup>7</sup>Sergio E. Baranzini, <sup>8</sup>Kristen M. Edwards, <sup>9</sup>Christopher J. Rose, <sup>10</sup>Nicholas J. Schork, <sup>11</sup>Akshat Singhal, <sup>12</sup>Byron C. Wallace, <sup>2</sup>Kelly P. Fisher, <sup>5</sup>Konstantinos Markakis, <sup>13</sup>Patrick J. Stover

<sup>1</sup>Department of Nutrition, Texas A&M University, College Station Texas, 77845 USA.

<sup>2</sup>Texas A&M University, Institute for Advancing Health Through Agriculture, College Station Texas, 77845 USA.

<sup>3</sup>Texas A&M Agriculture, Food, and Nutrition Evidence Center, Fort Worth, Texas, 76102 USA.

<sup>4</sup>Cornell University, Division of Nutritional Sciences, Ithaca NY 14850 USA.

<sup>5</sup>Department of Computer Science and Genome Center, University of California, Davis, Davis, California 95616 USA.

<sup>6</sup>USDA/NSF AI Institute for Next Generation Food Systems (AIFS), University of California, Davis, Davis, California 95616 USA.

<sup>7</sup>Department of Neurology, Weill Institute for Neurosciences, University of California, San Francisco, San Francisco, CA 94158 USA.

<sup>8</sup>Department of Mechanical Engineering, Massachusetts Institute of Technology, Cambridge, MA 02139 USA.

<sup>9</sup>Cluster for Reviews and Health Technology Assessments, Norwegian Institute of Public Health, Oslo, Norway and Centre for Epidemic Interventions Research (CEIR), Norwegian Institute of Public Health, Oslo, Norway.

<sup>10</sup>Translational Genomics Research Institute (TGen), a part of the City of Hope National Medical Center, Phoenix, AZ USA.

<sup>11</sup>Department of Computer Science and Engineering, University of California, San Diego, La Jolla, CA, USA.

<sup>12</sup>Khoury College of Computer Sciences, Northeastern University, Boston, Massachusetts, USA.

<sup>13</sup>Texas A&M University, 801 Cherry Street, Suite 850, Fort Worth, Texas 76102 USA.

## Corresponding Author:

Patrick J Stover

[Patrick.stover@tamu.edu](mailto:Patrick.stover@tamu.edu)

## This PDF file includes:

Tables S1 to S2

**Table S1.** Participant List for “Artificial Intelligence and Machine Learning in Evidence Synthesis and Evidence Generation in Food and Nutrition.”

| <b>Participant</b>     | <b>Affiliation</b>                                                                                                 |
|------------------------|--------------------------------------------------------------------------------------------------------------------|
| David B. Allison       | Indiana University, Bloomington                                                                                    |
| Regan Bailey           | Texas A&M Institute for Advancing Health Through Agriculture                                                       |
| Sergio Baranzini       | University of California, San Francisco                                                                            |
| Andrew Bremer          | National Institutes of Health                                                                                      |
| Lisa Bodnar            | University of Pittsburgh                                                                                           |
| Alexandra Cowan-Pyle   | Texas A&M Institute for Advancing Health Through Agriculture                                                       |
| Cindy Davis            | USDA, Agricultural Research Service                                                                                |
| Janet de Jesus         | U.S. Department of Health and Human Services                                                                       |
| Kristen Edwards        | Massachusetts Institute of Technology                                                                              |
| Laural English         | United States Department of Agriculture                                                                            |
| Martha Field           | Cornell University                                                                                                 |
| Sheila Fleischhacker   | USDA, National Institute of Food and Agriculture                                                                   |
| Jim Kennedy            | MARS Advanced Research Institute                                                                                   |
| Amanda MacFarlane      | Texas A&M Agriculture, Food, & Nutrition Evidence Center                                                           |
| Konstantinos Markakis  | University of California, Davis                                                                                    |
| Lynnette Neufeld       | Food and Agriculture Organization of the United Nations                                                            |
| Holly Nicaastro        | National Institutes of Health                                                                                      |
| Stefan Pasiakos        | Office of Dietary Supplements                                                                                      |
| Andrea Ramirez         | National Institutes of Health                                                                                      |
| Christopher Rose       | Norwegian Institute of Public Health                                                                               |
| Nicholas Schork        | The Translational Genomics Research Institute (TGen)                                                               |
| Akshat Singhal         | University of California, San Diego                                                                                |
| Maureen Spill          | Texas A&M Agriculture, Food, & Nutrition Evidence Center                                                           |
| Pam Stark-Reed         | USDA, Nutrition, Food Safety, and Quality                                                                          |
| Eve Stoodly            | United States Department of Agriculture                                                                            |
| Patrick Stover         | Texas A&M Institute for Advancing Health Through Agriculture                                                       |
| Ilias Tagkopoulos      | University of California, Davis, USDA AI Institute for Food Systems                                                |
| Jane Van Doren         | Center for Food Safety and Applied Nutrition, Food and Drug Administration, Department of Health and Human Service |
| Jan-Willem van Klinken | Brightseed                                                                                                         |
| Meera Viswanathan      | RTI International                                                                                                  |
| Byron Wallace          | Northeastern University                                                                                            |
| Jian Yan               | Bill and Melinda Gates Foundation                                                                                  |

**Table S2.** Agenda for “Artificial Intelligence and Machine Learning in Evidence Synthesis and Evidence Generation in Food and Nutrition.”

## **Artificial Intelligence and Machine Learning in Evidence Synthesis and Evidence Generation in Food and Nutrition**

Washington D.C.  
February 7-9, 2024

Coordinated by the Texas A&M Institute for Advancing Health Through Agriculture,  
University of California, Davis AI Institute for Next Generation Food Systems, and the  
National Academy of Sciences, Engineering and Medicine (NASEM)  
*With Funding Provided from a Bill and Melinda Gates Foundation Grant*

|                              |                                                                                                                                                                                                                                |
|------------------------------|--------------------------------------------------------------------------------------------------------------------------------------------------------------------------------------------------------------------------------|
| <b>Wednesday, February 7</b> | (Location: Lincoln Restaurant, 1110 Vermont Avenue NW)                                                                                                                                                                         |
| 6:00 PM                      | Sponsored Dinner                                                                                                                                                                                                               |
| <b>Thursday, February 8</b>  | (Location: NASEM, 2101 Constitution Avenue NW)                                                                                                                                                                                 |
| 8:00-8:45 AM                 | Breakfast                                                                                                                                                                                                                      |
| 8:45-9:00 AM                 | Welcome Remarks and Introduction to the Symposium<br><i>Regan Bailey, Texas A&amp;M Institute for Advancing Health Through Agriculture</i>                                                                                     |
| (9:00-11:25 AM)              | <b>Session 1: Current state and prospects for AI/ML and big data in generating high quality scientific evidence for decision making.</b><br><i>Session Chair, Amanda MacFarlane</i>                                            |
| 9:00-9:30 AM                 | <b>“AI, Data Sparsity, Digital Twins, and Personalized Nutrition”</b><br><i>Nicholas J. Schork, The Translational Genomics Research Institute (TGen)</i>                                                                       |
| 9:30-10:00 AM                | <b>"A knowledge graph approach to represent causal connections between food and health"</b><br><i>Sergio Baranzini, University of California, San Francisco</i>                                                                |
| 10:00-10:05                  | Opportunities through AI-derived evidence for Bioactives<br><i>Jan-Willem van Klinken</i>                                                                                                                                      |
| 10:05-10:25 AM               | <b>BREAK</b>                                                                                                                                                                                                                   |
| 10:25-10:55 AM               | <b>“Evidence Synthesis in Food Systems: A farm-to-fork approach”</b><br><i>Ilias Tagkopoulus, University of California, Davis</i>                                                                                              |
| 10:55-11:25 AM               | <b>“Cancer drug response models: interpretation, translation, and evaluation”</b><br><i>Akshat Singhal, University of California, San Diego</i>                                                                                |
| 11:25 AM-12:15 PM            | Speaker Panel Discussion ( <i>Facilitated by Amanda MacFarlane</i> )                                                                                                                                                           |
| 12:15-1:15 PM                | Lunch                                                                                                                                                                                                                          |
| (1:15-2:50 PM)               | <b>Session 2: Current state and prospects for the use of AI/ML in accelerating the process of reviewing and synthesizing scientific evidence.</b><br><i>Session Chair, Amanda MacFarlane</i>                                   |
| 1:15-1:45 PM                 | <b>“ADVISE: Accelerating the Creation of Evidence Syntheses for Global Development using Natural Language Processing-supported Human-AI Collaboration”</b><br><i>Kristen M. Edwards, Massachusetts Institute of Technology</i> |

|              |                                                                                                                                                                                                                              |
|--------------|------------------------------------------------------------------------------------------------------------------------------------------------------------------------------------------------------------------------------|
| 1:45-2:15 PM | <b>“Extracting and Synthesizing Medical Evidence with LLMs”</b><br><i>Byron Wallace, Northeastern University</i>                                                                                                             |
| 2:15-2:45 PM | <b>“What do we know about the effect of AI/ML on evidence synthesis in medicine, public health, and welfare, and how should we shape the future?”</b><br><i>Christopher James Rose, Norwegian Institute of Public Health</i> |
| 2:45-2:50 PM | All of Us Research Program<br><i>Andrea Ramirez</i>                                                                                                                                                                          |
| 2:50-3:10 PM | <b>BREAK</b>                                                                                                                                                                                                                 |
| 3:10-4:00 PM | Speaker Panel Discussion ( <i>Facilitated by Amanda MacFarlane</i> )                                                                                                                                                         |
| 4:00-4:45 PM | Short Presentations from Discussants                                                                                                                                                                                         |

Role of systematic reviews in the DRI process: riboflavin case study  
*Martha Field*

AI/ML Evidence Synthesis Processes used by the USDA Nutrition Evidence Systematic Review (NESR)  
*Laural English*

The world we want tomorrow starts with how we do business today  
*Jim Kennedy*

Using AI and ML to advance dietary supplements and nutrition research at the National Institutes of Health  
*Stefan Pasiakos*

AI/ML Research from the Department of Defense  
*Stefan Pasiakos*

ML-Driven Analysis using CAB Abstracts and the Global Public Health database to Identify Significant Research Gaps with Emphasis on Outcomes Related to International Development  
*Jaron Porciello*

Dietary patterns and pregnancy outcomes  
*Lisa Bodnar*

4:45 PM

**ADJOURN**

---

**Friday, February 9**

(Location: NASEM, 2101 Constitution Avenue NW)

---

8:00-8:45 AM

Breakfast

8:45-10:15 AM

All Attendee Discussion (*Facilitated by Regan Bailey and Patrick Stover*)

10:15-10:30

**BREAK**

10:30-11:15 AM

All Attendee Discussion (*Facilitated by Regan Bailey and Patrick Stover*)

11:15-11:30 AM

Closing Remarks

11:30 AM

**MEETING ADJOURNS**

---
